# Supplementary material for: Impact of the COVID-19 Italian Lockdown on the Physiological and Psychological Well-Being of Children with Fragile X Syndrome and Their Families
Source: MDPI journal article supplement (doi:10.3390/ijerph18115752), 2021-05-27
Supplement: s1 [file s1]

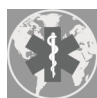

## Supplementary Files

### “Impact of the COVID-19 Italian lockdown on the physiological and psychological well-being of children with Fragile X Syndrome and their families”

Elisa Di Giorgio, Roberta Polli, Marco Lunghi & Alessandra Murgia

#### AD-HOC QUESTIONNAIRE

##### COVID INFORMATION SECTION

|                                                                                     |       |                  |           |               |
|-------------------------------------------------------------------------------------|-------|------------------|-----------|---------------|
| How often do you look for information about the COVID-19 infection during the day?  | Never | Sometimes        | Often     | Frequently    |
| In which of the following media are you looking for information about the COVID-19? | TV    | Daily News-paper | Inter-net | Social Me-dia |

##### SLEEP QUALITY SECTION\*

|                                                             |                      |                           |                           |                           |                      |
|-------------------------------------------------------------|----------------------|---------------------------|---------------------------|---------------------------|----------------------|
| How often did your child have difficulty falling asleep?    | Never                | Sometimes                 | Often                     |                           |                      |
| How long does it take your child to fall asleep?            | More than 60 minutes | Between 45 and 60 minutes | Between 30 and 45 minutes | Between 15 and 30 minutes | Less than 15 minutes |
| On average, how many hours does your child sleep per night? | 8-11 hours           | 5-8 hours                 | Less than 5 hours         |                           |                      |
| How frequent are night awakenings?                          | Never                | Less than 2 times         | Between 2 and 4 times     | More than 4 times         |                      |



|                                                           |     |    |  |  |  |
|-----------------------------------------------------------|-----|----|--|--|--|
| Does your child have difficulty waking up in the morning? | Yes | No |  |  |  |
|-----------------------------------------------------------|-----|----|--|--|--|

*EXTERNAL SUPPORT PERCEPTION SECTION\**

|                                                                                                              | Little | Enough | A lot |
|--------------------------------------------------------------------------------------------------------------|--------|--------|-------|
| How much support do you feel in the management of your child by <b>other relatives (e.g., grandparents)?</b> | 1      | 2      | 3     |
| How much support do you feel in the management of your child by <b>your friends?</b>                         | 1      | 2      | 3     |
| How much support do you feel in the management of your child by <b>X-Fragile Association?</b>                | 1      | 2      | 3     |
| How much support do you feel in the management of your child by <b>educators?</b>                            | 1      | 2      | 3     |
| How much support do you feel in the management of your child by <b>teachers?</b>                             | 1      | 2      | 3     |
| How much support do you feel in the management of your child by <b>other significant figures?</b>            | 1      | 2      | 3     |

*CHILDREN DAILY ROUTINES SECTION \**

|                                                                           |     |    |
|---------------------------------------------------------------------------|-----|----|
| Is your child involved in speech therapy?                                 | Yes | No |
| Is your child involved in psychomotor therapy?                            | Yes | No |
| Is your child involved in occupational therapy?                           | Yes | No |
| Is your child involved in sport activities?                               | Yes | No |
| Is your child involved in educational and peer activities (i.e., scouts)? | Yes | No |

\* Caregivers have to respond to these questions two times, thinking to the present during the lockdown, and retrospectively to the period before the lockdown.
